# Supplementary material for: Global Discrepancies between Numbers of Available SARS-CoV-2 Genomes and Human Development Indexes at Country Scales
Source: MDPI journal article supplement (doi:10.3390/v13050775), 2021-04-28
Supplement: s1 [file s1]

| Country        | Continent/<br>region | Number of cases | Number of<br>deaths | Human<br>development<br>index | Number of<br>genomes<br>(GISAID) | Number of<br>genomes (NCBI -<br>Nucleotide) | Number of genomes<br>(NCBI - Sequence<br>Read Archive (SRA)) | Number of genomes<br>(Total NCBI) | Number of<br>genomes<br>(EMBL-EBI) | Number of<br>genomes<br>(China NCB) | Number of<br>genomes per 100<br>deaths (GISAID) | Number of<br>genomes per 100<br>deaths (Total<br>NCBI) | Number of<br>genomes per 100<br>deaths (EMBL-<br>EBI) | Number of<br>genomes per 100<br>deaths (China<br>NCB) |
|----------------|----------------------|-----------------|---------------------|-------------------------------|----------------------------------|---------------------------------------------|--------------------------------------------------------------|-----------------------------------|------------------------------------|-------------------------------------|-------------------------------------------------|--------------------------------------------------------|-------------------------------------------------------|-------------------------------------------------------|
| Denmark        | Europe               | 197 892         | <b>2 072</b>        | 0,929                         | 34 819                           | 12                                          | 0                                                            | 12                                | 12                                 | 34 506                              | <b>1 680</b>                                    | <b>1,0</b>                                             | <b>1,0</b>                                            | <b>1 665</b>                                          |
| United Kingdom | Europe               | 3 754 448       | <b>103 324</b>      | 0,922                         | 192 556                          | 743                                         | 1519                                                         | 2262                              | 2242                               | 190 140                             | <b>186</b>                                      | <b>2,0</b>                                             | <b>2,0</b>                                            | <b>184</b>                                            |
| South Korea    | Asia                 | 77 395          | <b>1 399</b>        | 0,903                         | 1 631                            | 20                                          | 16                                                           | 36                                | 19                                 | 1 631                               | <b>117</b>                                      | <b>3,0</b>                                             | <b>1,0</b>                                            | <b>117</b>                                            |
| Netherlands    | Europe               | 979 702         | <b>13 925</b>       | 0,931                         | 7 422                            | 1545                                        | 1557                                                         | 3102                              | 1546                               | 5 874                               | <b>53</b>                                       | <b>22</b>                                              | <b>11</b>                                             | <b>42</b>                                             |
| Canada         | North America        | 770 433         | <b>19 659</b>       | 0,926                         | 8 613                            | 18                                          | 832                                                          | 850                               | 18                                 | 8 113                               | <b>44</b>                                       | <b>4,0</b>                                             | <b>0,0</b>                                            | <b>41</b>                                             |
| Ghana          | Africa               | 63 883          | <b>390</b>          | 0,592                         | 114                              | 77                                          | 0                                                            | 77                                | 240                                | 144                                 | <b>29</b>                                       | <b>20</b>                                              | <b>62</b>                                             | <b>37</b>                                             |
| USA            | North America        | 25 766 681      | <b>433 196</b>      | 0,924                         | 89 814                           | 32792                                       | 25685                                                        | 58477                             | 61437                              | 88 928                              | <b>21</b>                                       | <b>13</b>                                              | <b>14</b>                                             | <b>21</b>                                             |
| China          | Asia                 | 99 746          | <b>4 813</b>        | 0,752                         | 949                              | 239                                         | 599                                                          | 838                               | 241                                | 2 081                               | <b>20</b>                                       | <b>17</b>                                              | <b>5,0</b>                                            | <b>43</b>                                             |
| Nigeria        | Africa               | 127 024         | <b>1 547</b>        | 0,532                         | 290                              | 4                                           | 0                                                            | 4                                 | 4                                  | 261                                 | <b>19</b>                                       | <b>0,0</b>                                             | <b>0,0</b>                                            | <b>17</b>                                             |
| Germany        | Europe               | 2 194 562       | <b>55 883</b>       | 0,936                         | 4 582                            | 128                                         | 523                                                          | 651                               | 99                                 | 4 536                               | <b>8,2</b>                                      | <b>1,0</b>                                             | <b>0,0</b>                                            | <b>8,1</b>                                            |
| South Africa   | Africa               | 1 437 798       | <b>43 105</b>       | 0,699                         | 3 062                            | 1                                           | 0                                                            | 1                                 | 518                                | 2 836                               | <b>7,1</b>                                      | <b>0,0</b>                                             | <b>1,0</b>                                            | <b>6,6</b>                                            |
| France         | Europe               | 3 166 145       | <b>74 601</b>       | 0,901                         | 4 379                            | 93                                          | 145                                                          | 238                               | 96                                 | 3 813                               | <b>5,9</b>                                      | <b>0,0</b>                                             | <b>0,0</b>                                            | <b>5,1</b>                                            |
| Gabon          | Africa               | 10 536          | <b>68</b>           | 0,702                         | 4                                | 77                                          | 0                                                            | 77                                | 11                                 | 12                                  | <b>5,9</b>                                      | <b>113</b>                                             | <b>16</b>                                             | <b>18</b>                                             |
| Egypt          | Africa               | 164 282         | <b>9 169</b>        | 0,696                         | 366                              | 477                                         | 3                                                            | 480                               | 522                                | 602                                 | <b>4,0</b>                                      | <b>5,0</b>                                             | <b>6,0</b>                                            | <b>6,6</b>                                            |
| Italy          | Europe               | 2 515 507       | <b>87 381</b>       | 0,88                          | 2 974                            | 209                                         | 128                                                          | 337                               | 217                                | 2 933                               | <b>3,4</b>                                      | <b>0,0</b>                                             | <b>0,0</b>                                            | <b>3,4</b>                                            |
| India          | Asia                 | 10 720 048      | <b>154 010</b>      | 0,64                          | 4 778                            | 704                                         | 2473                                                         | 3177                              | 771                                | 2 933                               | <b>3,1</b>                                      | <b>2,0</b>                                             | <b>1,0</b>                                            | <b>1,9</b>                                            |
| Tunisia        | Africa               | 204 351         | <b>6 508</b>        | 0,735                         | 78                               | 71                                          | 0                                                            | 71                                | 72                                 | 123                                 | <b>1,2</b>                                      | <b>1,0</b>                                             | <b>1,0</b>                                            | <b>1,9</b>                                            |

National Center for Biotechnology Information (NCBI) - Nucleotide:

<https://www.ncbi.nlm.nih.gov/>

National Center for Biotechnology Information (NCBI) - Sequence Read Archive (SRA):

<https://www.ncbi.nlm.nih.gov/sra/>

European Bioinformatics Institute (EMBL-EBI):

<https://covid-19.ensembl.org/index.html>

China National Center for Bioinformation (CNCB):

<https://bigd.big.ac.cn/ncov/>
