# Supplementary material for: Global Discrepancies between Numbers of Available SARS-CoV-2 Genomes and Human Development Indexes at Country Scales
Source: MDPI journal article supplement (doi:10.3390/v13050775), 2021-04-28
Supplement: s1 [file s1]

**Supplementary Table S1.** Top 100 laboratories that sequenced SARS-CoV-2 genomes

| Rank | Laboratory                                                                                                                                                                                                          | Continent     | Country        | Region                      | Number of laboratories of the same country in the top 100 | Number of genomes |
|------|---------------------------------------------------------------------------------------------------------------------------------------------------------------------------------------------------------------------|---------------|----------------|-----------------------------|-----------------------------------------------------------|-------------------|
| 1    | Lighthouse Lab in Alderley Park                                                                                                                                                                                     | Europe        | United Kingdom | England                     | 21                                                        | 32 839            |
| 2    | Lighthouse Lab in Glasgow                                                                                                                                                                                           | Europe        | United Kingdom | England                     | 21                                                        | 22 378            |
| 3    | Lighthouse Lab in Milton Keynes                                                                                                                                                                                     | Europe        | United Kingdom | England                     | 21                                                        | 21 880            |
| 4    | Wales Specialist Virology Centre Sequencing lab: Pathogen Genomics Unit                                                                                                                                             | Europe        | United Kingdom | Wales                       | 5                                                         | 16 321            |
| 5    | Lighthouse Lab in Cambridge                                                                                                                                                                                         | Europe        | United Kingdom | England                     | 21                                                        | 16 059            |
| 6    | Pathogen Genomics Center, National Institute of Infectious Diseases                                                                                                                                                 | Asia          | Japan          |                             | 3                                                         | 12 748            |
| 7    | Department of Virus and Microbiological Special Diagnostics, Statens Serum Institut, Copenhagen, Denmark                                                                                                            | Europe        | Denmark        | Hovedstaden                 | 11                                                        | 10 445            |
| 8    | Microbiological Diagnostic Unit - Public Health Laboratory (MDU-PHL)                                                                                                                                                | Oceania       | Australia      | Victoria                    | 2                                                         | 10 036            |
| 9    | Department of Pathology, University of Cambridge                                                                                                                                                                    | Europe        | United Kingdom | England                     | 21                                                        | 8 505             |
| 10   | Houston Methodist Hospital                                                                                                                                                                                          | North America | USA            | Texas, Houston              | 24                                                        | 7 850             |
| 11   | Respiratory Virus Unit, Microbiology Services Colindale, Public Health England                                                                                                                                      | Europe        | United Kingdom | England                     | 21                                                        | 6 014             |
| 12   | Oxford Viromics, NDM, University of Oxford; Oxford University Hospitals; Basingstoke and North Hampshire Hospital                                                                                                   | Europe        | United Kingdom | England                     | 21                                                        | 5 425             |
| 13   | Houston Methodist Hospital                                                                                                                                                                                          | North America | USA            | Texas, Greater Houston Area | 24                                                        | 5 085             |
| 14   | Liverpool Clinical Laboratories                                                                                                                                                                                     | Europe        | United Kingdom | England                     | 21                                                        | 4 687             |
| 15   | Department of Virus and Microbiological Special Diagnostics, Statens Serum Institut, Copenhagen, Denmark                                                                                                            | Europe        | Denmark        | Midtjylland                 | 11                                                        | 4 452             |
| 16   | Quadram Institute Bioscience                                                                                                                                                                                        | Europe        | United Kingdom | England                     | 21                                                        | 4 430             |
| 17   | Department of Virus and Microbiological Special Diagnostics, Statens Serum Institut, Copenhagen, Denmark                                                                                                            | Europe        | Denmark        | Syddanmark                  | 11                                                        | 4 160             |
| 18   | Virology Department, Sheffield Teaching Hospitals NHS Foundation Trust/Department of Infection, Immunity and Cardiovascular Disease, The Medical School, University of Sheffield                                    | Europe        | United Kingdom | England                     | 21                                                        | 4 110             |
| 19   | West of Scotland Specialist Virology Centre, NHSGGC / MRC-University of Glasgow Centre for Virus Research                                                                                                           | Europe        | United Kingdom | Scotland                    | 5                                                         | 4 005             |
| 20   | Lighthouse Lab in Glasgow                                                                                                                                                                                           | Europe        | United Kingdom | Scotland                    | 5                                                         | 3 875             |
| 21   | Utah Public Health Laboratory                                                                                                                                                                                       | North America | USA            | Utah                        | 24                                                        | 3 751             |
| 22   | Victorian Infectious Diseases Reference Laboratory (VIDRL)                                                                                                                                                          | Oceania       | Australia      | Victoria                    | 2                                                         | 3 698             |
| 23   | Department of Virus and Microbiological Special Diagnostics, Statens Serum Institut, Denmark                                                                                                                        | Europe        | Denmark        | Hovedstaden                 | 11                                                        | 3 682             |
| 24   | Department of Virus and Microbiological Special Diagnostics, Statens Serum Institut, Copenhagen, Denmark                                                                                                            | Europe        | Denmark        | Sjaelland                   | 11                                                        | 3 448             |
| 25   | University College London, Great Ormond Street Hospital for Children NHS Foundation Trust, Imperial College Healthcare NHS Trust                                                                                    | Europe        | United Kingdom | England                     | 21                                                        | 3 365             |
| 26   | PHE South West Regional Laboratory, National Infection Service                                                                                                                                                      | Europe        | United Kingdom | England                     | 21                                                        | 3 306             |
| 27   | Michigan Department of Health and Human Services, Bureau of Laboratories                                                                                                                                            | North America | USA            | Michigan                    | 24                                                        | 3 104             |
| 28   | deCODE genetics                                                                                                                                                                                                     | Europe        | Iceland        | Reykjavik                   | 2                                                         | 2 915             |
| 29   | Wales Specialist Virology Centre                                                                                                                                                                                    | Europe        | United Kingdom | Wales                       | 5                                                         | 2 844             |
| 30   | Virology Department, Royal Infirmary of Edinburgh, NHS Lothian / School of Biological Sciences, University of Edinburgh / Institute of Genetics and Molecular Medicine, University of Edinburgh                     | Europe        | United Kingdom | Scotland                    | 5                                                         | 2 736             |
| 31   | Queens Medical Centre, Clinical Microbiology Department / DeepSeq Nottingham                                                                                                                                        | Europe        | United Kingdom | England                     | 21                                                        | 2 681             |
| 32   | Florida Bureau of Public Health Laboratories                                                                                                                                                                        | North America | USA            | Florida                     | 24                                                        | 2 655             |
| 33   | Department of Virus and Microbiological Special Diagnostics, Statens Serum Institut, Copenhagen, Denmark                                                                                                            | Europe        | Denmark        | Nordjylland                 | 11                                                        | 2 630             |
| 34   | UW Virology Lab                                                                                                                                                                                                     | North America | USA            | Washington                  | 24                                                        | 2 600             |
| 35   | Northumbria University / South Tees Hospitals NHS Foundation Trust / North Cumbria Integrated Care NHS Foundation Trust / North Tees and Hartlepool NHS Foundation Trust / Newcastle Hospitals NHS Foundation Trust | Europe        | United Kingdom | England                     | 21                                                        | 2 518             |
| 36   | Centre for Enzyme Innovation, University of Portsmouth / Translational Research Laboratory, Portsmouth Hospitals NHS Trust                                                                                          | Europe        | United Kingdom | England                     | 21                                                        | 2 466             |
| 37   | Laboratoire national de santé, Microbiology, Virology                                                                                                                                                               | Europe        | Luxembourg     | Luxembourg                  | 1                                                         | 2 054             |
| 38   | Washington State Department of Health                                                                                                                                                                               | North America | USA            | Washington, Yakima County   | 24                                                        | 1 950             |
| 39   | Lighthouse Lab in Alderley Park                                                                                                                                                                                     | Europe        | United Kingdom | Wales                       | 5                                                         | 1 916             |
| 40   | University of Wisconsin-Madison AIDS Vaccine Research Laboratories                                                                                                                                                  | North America | USA            | Wisconsin, Dane County      | 24                                                        | 1 861             |
| 41   | Respiratory Virus Unit, National Infection Service, Public Health England                                                                                                                                           | Europe        | United Kingdom | England                     | 21                                                        | 1 855             |

**Supplementary Table S1.** Top 100 laboratories that sequenced SARS-CoV-2 genomes

| Rank | Laboratory                                                                                                     | Continent     | Country              | Region                                | Number of laboratories of the same country in the top 100 | Number of genomes |
|------|----------------------------------------------------------------------------------------------------------------|---------------|----------------------|---------------------------------------|-----------------------------------------------------------|-------------------|
| 42   | University of Michigan Clinical Microbiology Laboratory                                                        | North America | USA                  | Michigan                              | 24                                                        | 1 720             |
| 43   | Dutch COVID-19 response team                                                                                   | Europe        | Netherlands          | South Holland                         | 6                                                         | 1 700             |
| 44   | Alberta Precision Labs (APL)                                                                                   | North America | Canada               | Alberta                               | 5                                                         | 1 674             |
| 45   | University of Exeter                                                                                           | Europe        | United Kingdom       | England                               | 21                                                        | 1 651             |
| 46   | San Diego County Public Health Laboratory                                                                      | North America | USA                  | California, San Diego                 | 24                                                        | 1 610             |
| 47   | Regional Virus Laboratory, Belfast Health and Social Care Trust                                                | Europe        | United Kingdom       | Northern Ireland                      | 1                                                         | 1 594             |
| 48   | IHU Mediterranee Infection                                                                                     | Europe        | France               | Provence-Alpes-Côte d'Azur, Marseille | 1                                                         | 1 585             |
| 49   | Laboratoire de santé publique du Québec                                                                        | North America | Canada               | Quebec                                | 5                                                         | 1 540             |
| 50   | Department of Virus and Microbiological Special Diagnostics, Statens Serum Institut, Denmark                   | Europe        | Denmark              | Syddanmark                            | 11                                                        | 1 393             |
| 51   | Department of Clinical Microbiology                                                                            | Europe        | Belgium              | Liège                                 | 1                                                         | 1 353             |
| 52   | NHSGGC West of Scotland Specialist Virology Centre / MRC-University of Glasgow Centre for Virus Research       | Europe        | United Kingdom       | Scotland                              | 5                                                         | 1 350             |
| 53   | University of Birmingham                                                                                       | Europe        | United Kingdom       | England                               | 21                                                        | 1 349             |
| 54   | Virginia DCLS                                                                                                  | North America | USA                  | Virginia                              | 24                                                        | 1 338             |
| 55   | Department of Virus and Microbiological Special Diagnostics, Statens Serum Institut, Denmark                   | Europe        | Denmark              | Midtjylland                           | 11                                                        | 1 307             |
| 56   | Instituto Nacional de Saude (INSA)                                                                             | Europe        | Portugal             | Portugal                              | 1                                                         | 1 287             |
| 57   | Originating lab: Wales Specialist Virology Centre Sequencing lab: Pathogen Genomics Unit                       | Europe        | United Kingdom       | Wales                                 | 5                                                         | 1 268             |
| 58   | The National University Hospital of Iceland                                                                    | Europe        | Iceland              | Reykjavik                             | 2                                                         | 1 260             |
| 59   | National Public Health Laboratory, National Centre for Infectious Diseases                                     | Asia          | Singapore            | Singapore, Singapore                  | 1                                                         | 1 136             |
| 60   | Bioinformatics and Biostatistics Lab, Advanced Sequencing Facility                                             | Europe        | United Kingdom       | England                               | 21                                                        | 1 126             |
| 61   | Department of Virology and Immunology, University of Helsinki and Helsinki University Hospital, Huslab Finland | Europe        | Finland              | Uusimaa                               | 1                                                         | 1 114             |
| 62   | AZ SPHL, Arizona Department of Health Services                                                                 | North America | USA                  | Arizona                               | 24                                                        | 1 109             |
| 63   | Quest Diagnostics                                                                                              | North America | USA                  | California                            | 24                                                        | 1 101             |
| 64   | Group 42 (G42) Healthcare, Abu Dhabi, United Arab Emirates; Department of Health, The United Arab Emirates     | Asia          | United Arab Emirates | Abu Dhabi                             | 1                                                         | 1 067             |
| 65   | Dutch COVID-19 response team                                                                                   | Europe        | Netherlands          | North Brabant                         | 6                                                         | 1 061             |
| 66   | Santa Clara County Public Health Laboratory                                                                    | North America | USA                  | California, Santa Clara County        | 24                                                        | 1 032             |
| 67   | Viollier AG                                                                                                    | Europe        | Switzerland          | Bern                                  | 3                                                         | 980               |
| 68   | Minnesota Department of Health, Public Health Laboratory                                                       | North America | USA                  | Minnesota                             | 24                                                        | 979               |
| 69   | NU-OMICS DNA Sequencing research facility, Northumbria University                                              | Europe        | United Kingdom       | England                               | 21                                                        | 953               |
| 70   | Public Health Ontario Laboratory                                                                               | North America | Canada               | Ontario                               | 5                                                         | 944               |
| 71   | University Medical Center Hamburg Eppendorf                                                                    | Europe        | Germany              | Hamburg                               | 1                                                         | 942               |
| 72   | Viollier AG                                                                                                    | Europe        | Switzerland          | Zürich                                | 3                                                         | 921               |
| 73   | BCCDC Public Health Laboratory                                                                                 | North America | Canada               | British Columbia                      | 5                                                         | 920               |
| 74   | Massachusetts General Hospital                                                                                 | North America | USA                  | Massachusetts                         | 24                                                        | 919               |
| 75   | Massachusetts State Public Health Laboratory                                                                   | North America | USA                  | Massachusetts                         | 24                                                        | 916               |
| 76   | Department of Virus and Microbiological Special Diagnostics, Statens Serum Institut, Denmark                   | Europe        | Denmark              | Sjaelland                             | 11                                                        | 912               |
| 77   | Wyoming Public Health Laboratory                                                                               | North America | USA                  | Wyoming                               | 24                                                        | 899               |
| 78   | Dutch COVID-19 response team                                                                                   | Europe        | Netherlands          | Utrecht                               | 6                                                         | 895               |
| 79   | Department of Virus and Microbiological Special Diagnostics, Statens Serum Institut, Denmark                   | Europe        | Denmark              | Nordjylland                           | 11                                                        | 867               |
| 80   | Ginkgo Bioworks Clinical Laboratory                                                                            | North America | USA                  | Utah                                  | 24                                                        | 845               |
| 81   | Hospital General Universitario Gregorio Marañón                                                                | Europe        | Spain                | Madrid, Madrid                        | 1                                                         | 843               |
| 82   | New Mexico Department of Health Scientific Laboratory                                                          | North America | USA                  | New Mexico                            | 24                                                        | 839               |
| 83   | Toronto Invasive Bacterial Diseases Network                                                                    | North America | Canada               | Ontario, Toronto                      | 5                                                         | 829               |
| 84   | Dutch COVID-19 response team                                                                                   | Europe        | Netherlands          | Netherlands                           | 6                                                         | 824               |
| 85   | TGen North                                                                                                     | North America | USA                  | Arizona                               | 24                                                        | 799               |
| 86   | Lighthouse Lab in Milton Keynes                                                                                | Europe        | United Kingdom       | Wales                                 | 5                                                         | 785               |

**Supplementary Table S1.** Top 100 laboratories that sequenced SARS-CoV-2 genomes

| Rank | Laboratory                                                                                                                             | Continent     | Country        | Region                       | Number of laboratories<br>of the same country in<br>the top 100 | Number of<br>genomes |
|------|----------------------------------------------------------------------------------------------------------------------------------------|---------------|----------------|------------------------------|-----------------------------------------------------------------|----------------------|
| 87   | Division of Emerging Infectious Diseases, Bureau of Infectious Diseases Diagnosis Control, Korea Disease Control and Prevention Agency | Asia          | South Korea    | South Korea                  | 2                                                               | <b>775</b>           |
| 88   | Department of Infectious Diseases, Kobe Institute of Health                                                                            | Asia          | Japan          | Japan                        | 3                                                               | <b>763</b>           |
| 89   | Virology Department, Royal Infirmary of Edinburgh, NHS Lothian / School of Biological Sciences, University of Edinburgh                | Europe        | United Kingdom | Scotland                     | 5                                                               | <b>759</b>           |
| 90   | LSUHS Emerging Viral Threat Laboratory                                                                                                 | North America | USA            | Louisiana, Caddo Parish      | 24                                                              | <b>755</b>           |
| 91   | Dutch COVID-19 response team                                                                                                           | Europe        | Netherlands    | Gelderland                   | 6                                                               | <b>742</b>           |
| 92   | University College London Hospital                                                                                                     | Europe        | United Kingdom | England                      | 21                                                              | <b>740</b>           |
| 93   | Division of Viral Diseases, Center for Laboratory Control of Infectious Diseases, Korea Centers for Diseases Control and Prevention    | Asia          | South Korea    | South Korea                  | 2                                                               | <b>726</b>           |
| 94   | Dutch COVID-19 response team                                                                                                           | Europe        | Netherlands    | North Holland                | 6                                                               | <b>715</b>           |
| 95   | Viollier AG                                                                                                                            | Europe        | Switzerland    | Basel-Land                   | 3                                                               | <b>700</b>           |
| 96   | Fukuoka Institute of Health and Environmental Sciences                                                                                 | Asia          | Japan          | Japan                        | 3                                                               | <b>694</b>           |
| 97   | Sonora Quest Laboratories, Laboratory Sciences of Arizona                                                                              | North America | USA            | Arizona                      | 24                                                              | <b>686</b>           |
| 98   | Department of Virus and Microbiological Special Diagnostics, Statens Serum Institut, Copenhagen, Denmark                               | Europe        | Denmark        | Denmark                      | 11                                                              | <b>642</b>           |
| 99   | OHSU Lab Services Molecular Microbiology Lab                                                                                           | North America | USA            | Oregon, Washington County OR | 24                                                              | <b>640</b>           |
| 100  | Istituto Zooprofilattico Sperimentale del Mezzogiorno                                                                                  | Europe        | Italy          | Campania                     | 1                                                               | <b>625</b>           |
